# Supplementary material
Source: MDPI journal article supplement (https://www.mdpi.com/2076-3417/9/21/4539)
Supplement: s1 [file s1]

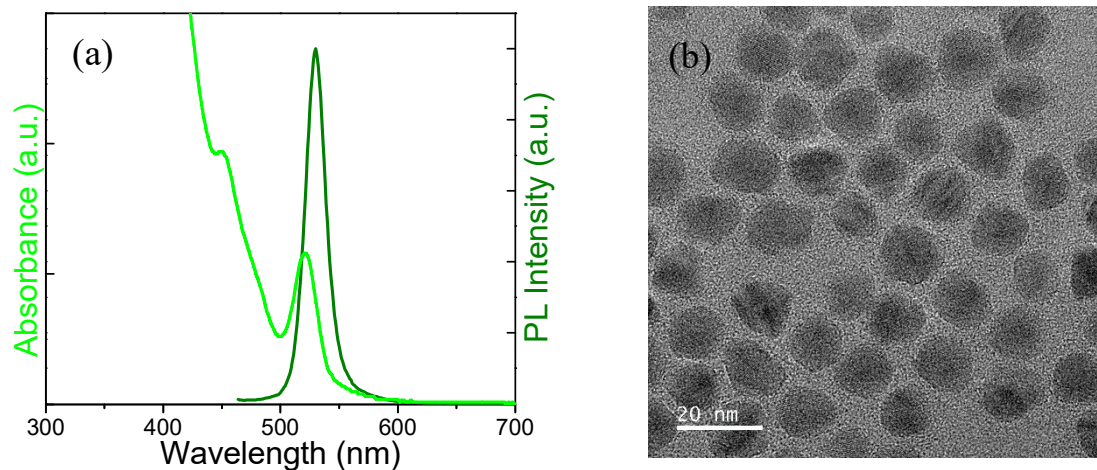

Figure S1. (a) PL and absorption spectra and (b) TEM image of CdZnSeS/Z

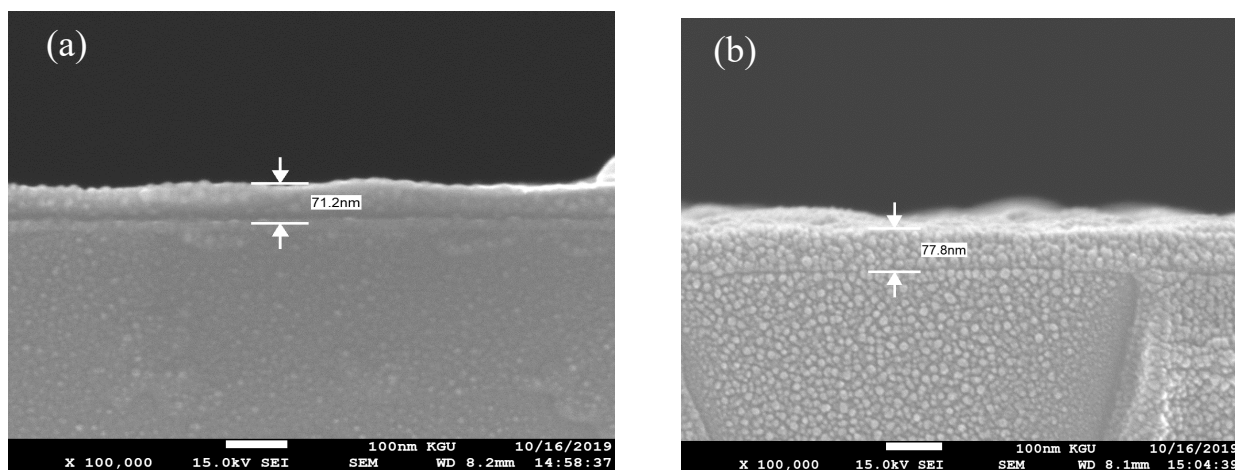

Figure S2. Cross-sectional SEM images of ZnO layer on patterned ITO glass with (a) 1SC and (b) 2SC.
